# Supplementary material for: New air-stable solution-processed organic n-type semiconductors based on sulfur-rich core-expanded naphthalene diimides
Source: Royal Society of Chemistry journal article supplement (doi:10.1039/c1jm13637b), 2011-01-01

## Supplementary Information

### New Air-stable Solution-processed Organic n-type Semiconductors Based on Sulphur-rich Core-expanded Naphthalene Diimides

Luxi Tan, Yunlong Guo, Guanxin Zhang,\* Yang Yang, Deqing Zhang,\* Gui Yu, Wei Xu and Yunqi Liu

#### Contents

1. TGA analysis of compounds **1** and **2**..... S2
2. UV-Vis absorption spectra of solution and thin film of compound **2**.....S3
3. Theoretical calculations for **1** and **2**.....S3-S7
4. <sup>1</sup>HNMR & <sup>13</sup>CNMR spectra of compound **1** and **2**.....S8-S9

## 1. TGA analysis of **1** and **2**

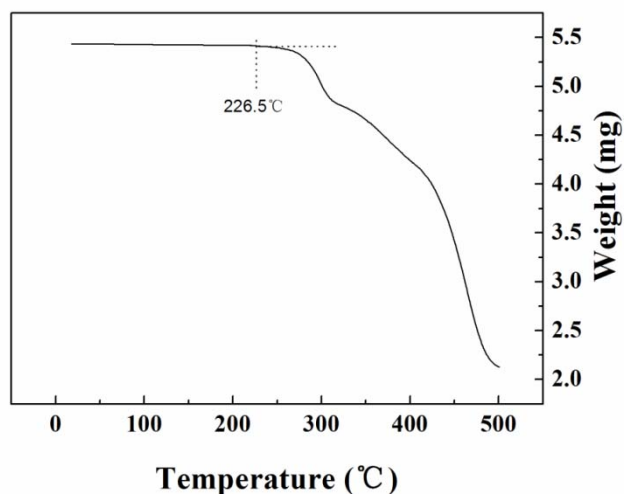

Figure S1. TGA analysis of **1**.

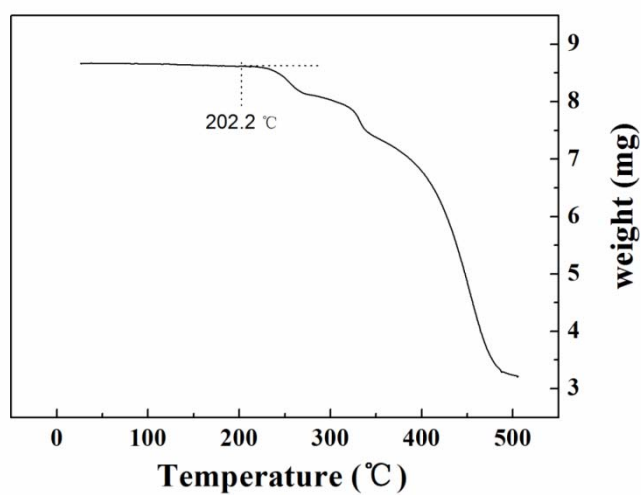

Figure S2. TGA analysis of **2**.

## 2. UV-Vis absorption spectrum of solution and thin film of compound 2

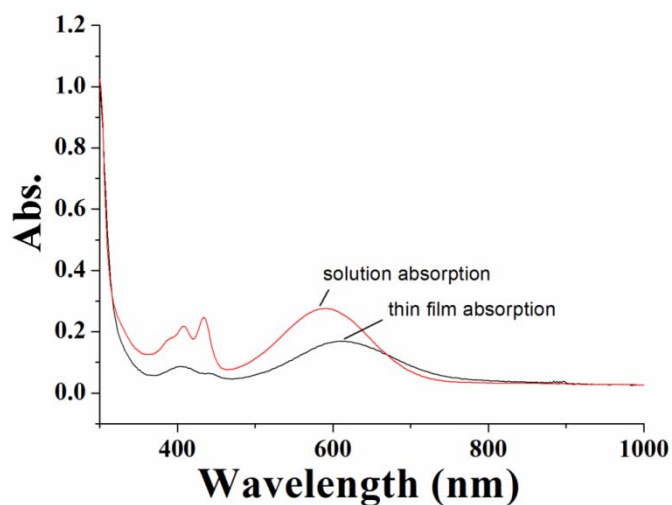

Figure S3. UV-Vis absorption of solution and thin film of compound 2

## 3. Theoretical calculations for 1 and 2

### Compound 1

Calculation method: B3LYP/6-31G (d) with Gaussian 03

#### Coordinates

-----

| X             | Y         | Z         |
|---------------|-----------|-----------|
| 1 C 2.326295  | 0.717671  | 0.756839  |
| 2 C 2.326261  | -0.717181 | 0.757025  |
| 3 C 1.149877  | -1.403353 | 0.429854  |
| 4 C -0.004279 | -0.706189 | -0.017988 |
| 5 C -0.004318 | 0.706675  | -0.017978 |
| 6 C 1.149886  | 1.403843  | 0.429717  |
| 7 C -1.158025 | -1.404676 | -0.464479 |

|      |           |           |           |
|------|-----------|-----------|-----------|
| 8 C  | -2.336516 | -0.717253 | -0.783479 |
| 9 C  | -2.336595 | 0.717574  | -0.783375 |
| 10 C | -1.158135 | 1.405102  | -0.464373 |
| 11 C | -1.062364 | 2.874205  | -0.659288 |
| 12 N | -0.00293  | 3.522322  | -0.023026 |
| 13 C | 1.050721  | 2.872218  | 0.614686  |
| 14 C | 1.050643  | -2.871712 | 0.614886  |
| 15 N | -0.002683 | -3.521871 | -0.023303 |
| 16 C | -1.062155 | -2.873771 | -0.659476 |
| 17 S | 3.758456  | 1.670489  | 1.284244  |
| 18 C | 5.055949  | 0.672332  | 0.612421  |
| 19 C | 5.055897  | -0.672306 | 0.612815  |
| 20 S | 3.758209  | -1.669905 | 1.285067  |
| 21 S | -3.775934 | -1.666902 | -1.29887  |
| 22 C | -5.062819 | -0.672427 | -0.601761 |
| 23 C | -5.062916 | 0.672228  | -0.601574 |
| 24 S | -3.776212 | 1.667111  | -1.298443 |
| 25 S | 6.410989  | 1.469823  | -0.189135 |
| 26 C | 7.301385  | -0.000449 | -0.61903  |
| 27 S | 6.410885  | -1.470395 | -0.188216 |
| 28 S | -6.401187 | -1.470543 | 0.226511  |
| 29 C | -7.282746 | -0.000435 | 0.675184  |

|      |           |           |           |
|------|-----------|-----------|-----------|
| 30 S | -6.401406 | 1.469923  | 0.22689   |
| 31 O | 1.854671  | 3.514566  | 1.277308  |
| 32 O | -1.871394 | 3.498183  | -1.332527 |
| 33 O | 1.854335  | -3.513988 | 1.277909  |
| 34 O | -1.871114 | -3.497702 | -1.332861 |
| 35 S | 8.766059  | -0.000736 | -1.360562 |
| 36 S | -8.73216  | -0.000639 | 1.446148  |
| 37 C | 0.019766  | 4.992774  | 0.002388  |
| 38 C | 0.020037  | -4.992305 | 0.002068  |
| 39 H | -0.81444  | 5.347733  | -0.596599 |
| 40 H | -0.067058 | 5.342598  | 1.032776  |
| 41 H | 0.965585  | 5.350948  | -0.40715  |
| 42 H | -0.813787 | -5.347263 | -0.597459 |
| 43 H | -0.067421 | -5.342199 | 1.03238   |
| 44 H | 0.966115  | -5.350428 | -0.406906 |

-----  
Total energies: 6125.0602015394 Hartrees

Compound **2**

Calculation method: B3LYP/6-31G (d) with Gaussian 03

Coordinates

-----

|     | X         | Y         | Z        |
|-----|-----------|-----------|----------|
| 1 C | -2.350647 | -0.717292 | 0.684436 |

|      |           |           |           |
|------|-----------|-----------|-----------|
| 2 C  | -2.350648 | 0.717322  | 0.684423  |
| 3 C  | -1.164495 | 1.403965  | 0.396092  |
| 4 C  | 0.003509  | 0.706676  | -0.013975 |
| 5 C  | 0.003504  | -0.706661 | -0.013977 |
| 6 C  | -1.1645   | -1.403941 | 0.396102  |
| 7 C  | 1.171094  | 1.405256  | -0.422824 |
| 8 C  | 2.359102  | 0.717367  | -0.702875 |
| 9 C  | 2.359097  | -0.717365 | -0.702875 |
| 10 C | 1.171085  | -1.405248 | -0.422827 |
| 11 C | 1.081782  | -2.87419  | -0.62153  |
| 12 N | 0.001696  | -3.52229  | -0.020277 |
| 13 C | -1.07152  | -2.872194 | 0.584704  |
| 14 C | -1.071522 | 2.872216  | 0.58468   |
| 15 N | 0.00175   | 3.522306  | -0.020223 |
| 16 C | 1.081798  | 2.8742    | -0.621518 |
| 17 S | -3.802404 | -1.662603 | 1.16466   |
| 18 C | -5.075588 | -0.671699 | 0.433828  |
| 19 C | -5.075589 | 0.671707  | 0.433803  |
| 20 S | -3.80241  | 1.662644  | 1.164599  |
| 21 S | 3.817396  | 1.659815  | -1.171016 |
| 22 C | 5.079947  | 0.671691  | -0.41847  |
| 23 C | 5.079943  | -0.671712 | -0.41847  |

|      |           |           |           |
|------|-----------|-----------|-----------|
| 24 S | 3.817384  | -1.659823 | -1.17102  |
| 25 S | -6.368221 | -1.504221 | -0.434098 |
| 26 C | -7.245025 | -0.000026 | -0.942328 |
| 27 S | -6.368226 | 1.504192  | -0.434155 |
| 28 S | 6.357212  | 1.504312  | 0.471671  |
| 29 C | 7.224911  | -0.000017 | 0.995289  |
| 30 S | 6.357201  | -1.504341 | 0.471673  |
| 31 O | -1.895292 | -3.514751 | 1.222219  |
| 32 O | 1.911836  | -3.498287 | -1.268531 |
| 33 O | -1.895339 | 3.514785  | 1.222125  |
| 34 O | 1.91184   | 3.498289  | -1.268546 |
| 35 O | -8.27454  | -0.000039 | -1.556404 |
| 36 O | 8.243544  | -0.000021 | 1.627246  |
| 37 C | -0.02192  | -4.99244  | 0.00383   |
| 38 C | -0.021859 | 4.992456  | 0.003909  |
| 39 H | 0.825222  | -5.34716  | -0.576922 |
| 40 H | 0.042448  | -5.343617 | 1.035519  |
| 41 H | -0.958833 | -5.34991  | -0.426186 |
| 42 H | 0.826139  | 5.347181  | -0.575589 |
| 43 H | 0.040966  | 5.343517  | 1.035721  |
| 44 H | -0.958101 | 5.350039  | -0.427499 |

-----  
Total energy: 5778.3460768110 Hartrees

## 4. <sup>1</sup>H NMR & <sup>13</sup>C NMR of compound 1 and 2

### Compound 1

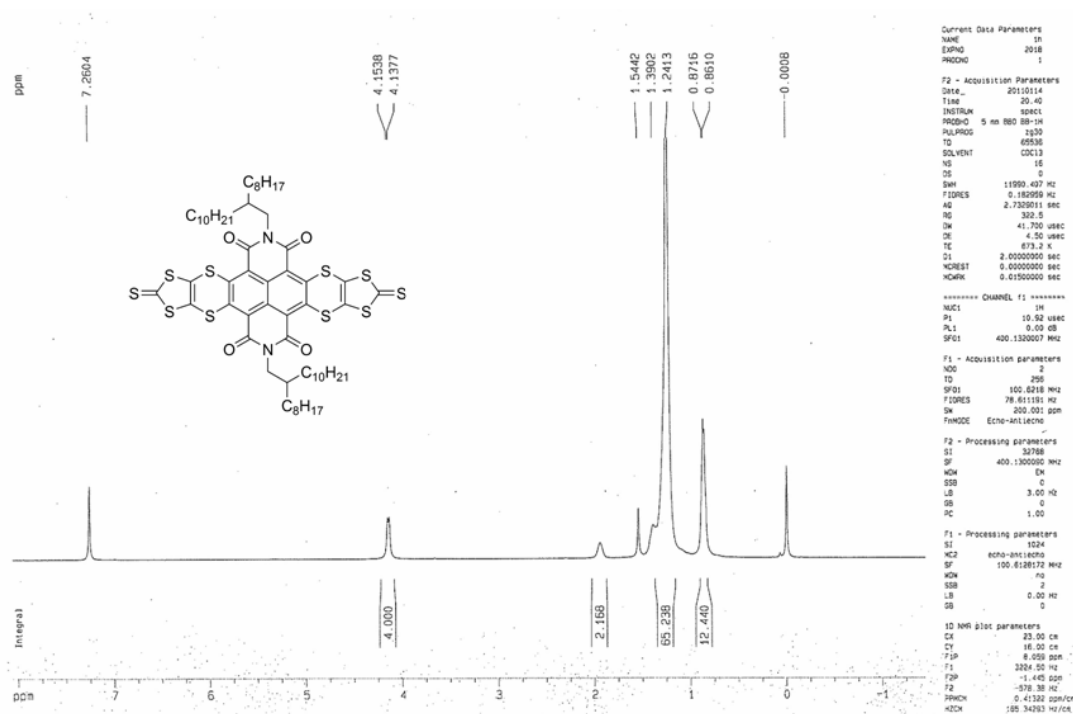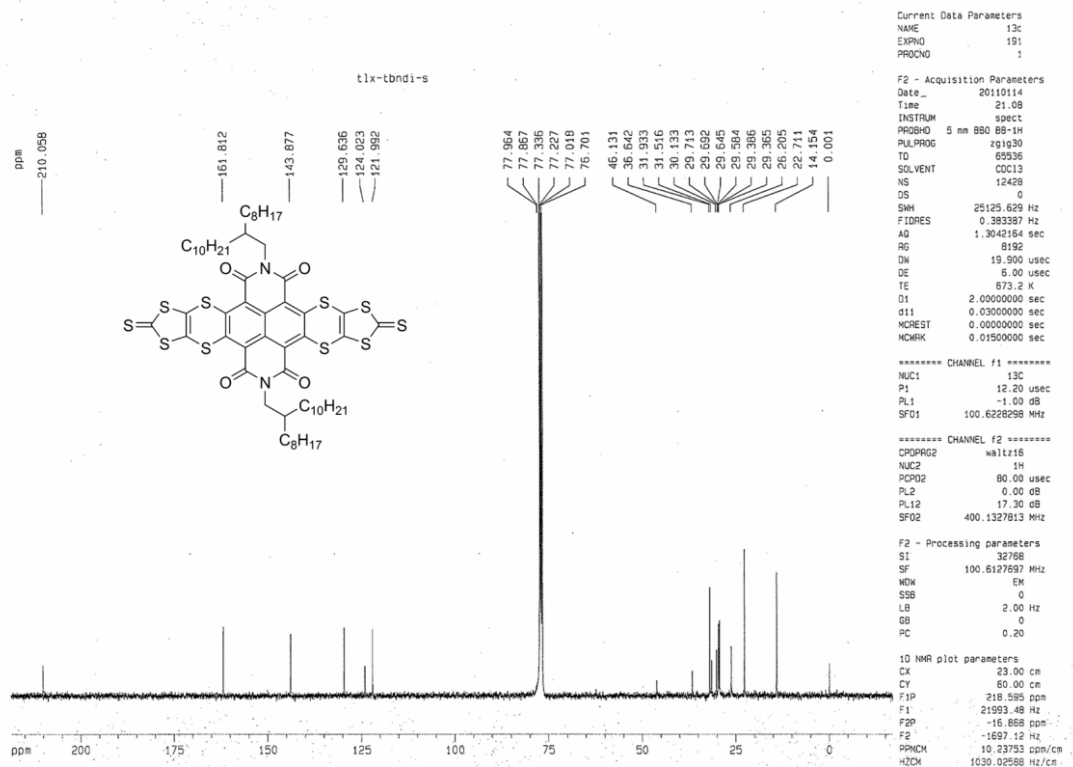

### Compound 2



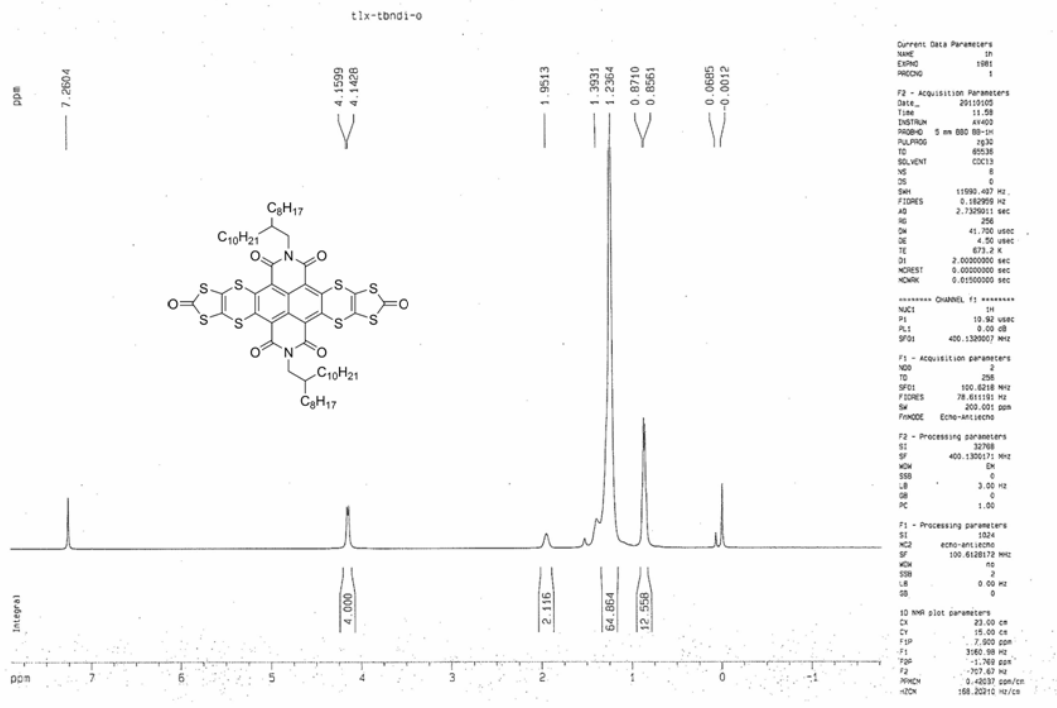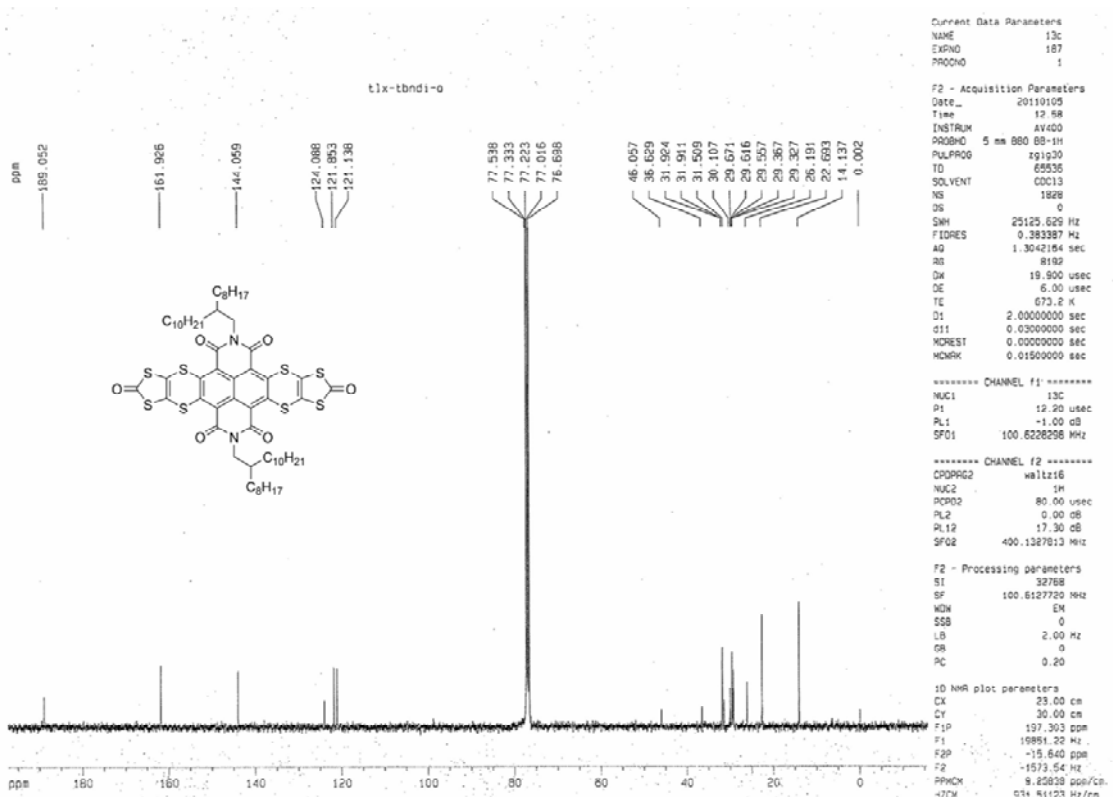

Supplement: c1jm13637b.pdf [file c1jm13637b.pdf]
